# Supplementary material
Source: publisher figshare collection journal article supplement (https://frontiersin.figshare.com/ndownloader/files/33183260)
Supplement: Supplementary file 1 [file 33183260]

**Table S2.** Most abundant cis-regulatory elements present in the 1600 bp up-stream promoter regions of the *AhN4L-1* and *AhN4L-2* genes. Also shown are elements exclusively present in the promoter region of the *AhN4L-1* gene.

| SHARED CIS-REGULATORY ELEMENTS                                              |                                                                                                                                                                                                                                                                                                                                                                                                                                                                                                                                                                                                                                                                                |
|-----------------------------------------------------------------------------|--------------------------------------------------------------------------------------------------------------------------------------------------------------------------------------------------------------------------------------------------------------------------------------------------------------------------------------------------------------------------------------------------------------------------------------------------------------------------------------------------------------------------------------------------------------------------------------------------------------------------------------------------------------------------------|
| Family                                                                      | Function                                                                                                                                                                                                                                                                                                                                                                                                                                                                                                                                                                                                                                                                       |
| <b>AHBP (Recognized by homeobox proteins in Arabidopsis)</b>                | Regulation of genes involved in development processes (Trindade et al. 1999; Meng et al., 2020). Also present in nitric oxide-responsive genes that control growth, development, and responses to environmental stress conditions (Mukherjee et al., 2009; Shi et al., 2011).                                                                                                                                                                                                                                                                                                                                                                                                  |
| <b>GT-Box (Identified in light-regulated promoters)</b>                     | Abundant in genes that control plant growth regulation and responses to numerous stress conditions. Found in the defense-related chalcone synthase gene in in soya and common bean plants (Lawton et al. 1991; Terzaghi and Cashmore 1995).                                                                                                                                                                                                                                                                                                                                                                                                                                    |
| <b>L1- Box (specific motifs for the expression of L1 proteins)</b>          | L1 proteins a known to control leaf and flower development. It is relevant in the proline-rich Proteoderma factor 1 protein, exclusive of the L1 layer of the apical meristem apical, the proteoderm and organ primordia (Abe et al. 2001; Lau et al. 2012).                                                                                                                                                                                                                                                                                                                                                                                                                   |
| <b>MADS (Recognized by MADS-box TFs)</b>                                    | MADS-box transcription factors control diverse developmental processes in flowering plants including root, flower and fruit development. They are known to regulate the transition from vegetative to reproductive development. They are necessary for the development of flowering structures and floral meristems (e.g. via Sepallata 3 TF) (Becker and Theißen 2003; Angenent et al. 2009; Erdmann et al., 2010; Smaczniak et al. 2012).                                                                                                                                                                                                                                    |
| <b>DOF (DNA-binding One Zinc Finger)</b>                                    | The DOF family of TFs regulate plant responses to light and phytohormones. They also control seed maturation and germination. DOF TF genes are widely distributed, being found not only in gymnosperms and angiosperms but also in lower plants like mosses and algae (Noguero et al., 2013).                                                                                                                                                                                                                                                                                                                                                                                  |
| CIS-REGULATORY ELEMENTS PRESENT EXCLUSIVELY IN THE <i>AhN4L-1</i> GENE      |                                                                                                                                                                                                                                                                                                                                                                                                                                                                                                                                                                                                                                                                                |
| <b>ABA-responsive and embryo-specification elements in the Dc3 promoter</b> | Recognized by a class of sunflower bZIP transcription factors, <i>Dc3</i> promoter-binding factor-1 and 2 (DPBF-1 and 2) that are similar to the plant G-box binding factor GBF-4. Also found in the carrot ( <i>Daucus carota</i> ) <i>Dc3</i> gene promoter. <i>Dc3</i> expression is normally embryo-specific, and may be also induced by Arabidopsis abscisic acid (ABA). Also present in <i>ABI5</i> , an Arabidopsis ABA-responsive gene that encodes a bZIP transcription factor. <i>ABI5</i> regulates a subset of late embryogenesis-abundant ( <i>LEA</i> ) genes, whereas <i>abi5</i> mutants have pleiotropic defects in plant ABA responses; <i>GIA1</i> (growth- |

|                                                                                                                             |                                                                                                                                                                                                                                                                                                                                                                                                                                                   |
|-----------------------------------------------------------------------------------------------------------------------------|---------------------------------------------------------------------------------------------------------------------------------------------------------------------------------------------------------------------------------------------------------------------------------------------------------------------------------------------------------------------------------------------------------------------------------------------------|
|                                                                                                                             | insensitivity to ABA) is identical to <i>ABI5</i> (Kim et al. 1997; Finkelstein and Lynch, 2000; Lopez-Molina and Chua, 2000).                                                                                                                                                                                                                                                                                                                    |
| <b>Ethylene-responsive element (ERE)</b>                                                                                    | Present in the E4 ethylene responsive element (ERE) of tomato ( <i>Solanum lycopersicum</i> ) and in the carnation <i>GST</i> genes; <i>GST1</i> is related to senescence. Also found in the 5'-LTR region of <i>TLC1.1</i> retrotransposon family in <i>Solanum chilense</i> . ERE motifs mediate ethylene-induced activation of the U3 promoter region (Montgomery et al., 1993; Itzhaki et al., 1994; Rawat et al., 2005; Tapia et al., 2005). |
| <b>Recognized by meristematic WUSCHEL-type homeobox genes.</b>                                                              | The Arabidopsis WUSCHEL (WUS) protein is involved in the specification of the stem cells in the shoot apical meristem (SAM) and in the specification and maintenance of the root apical meristem (RAM) stem cells of rice (Kamiya et al., 2003).                                                                                                                                                                                                  |
| <b>SP8a (ACTGTGTA) and SP8b (TACTATT) sequences present in genes coding for sporamin and beta-amylase of tuberous roots</b> | Sporamin and beta-amylase are two prominent storage proteins that accumulate in tuberous roots of sweet potato. The expression of sporamin- and beta-amylase-coding genes is induced by the exogenous application of sucrose or polygalacturonic acid (Ishiguro and Nakamura, 1992, 1994).                                                                                                                                                        |

- Abe, M., Takahashi, T., and Komeda, Y. (2001). Identification of a cis-regulatory element for L1 layer-specific gene expression, which is targeted by an L1-specific homeodomain protein. *Plant J.* 26, 487-494. doi: 10.1046/j.1365-313x.2001.01047.x
- Angenent, G.C., and Immink, R.G.H. (2009). "Combinatorial action of petunia MADS box genes and their protein products" in: Petunia, eds. Gerats, T., and Strommer, J. (Springer, New York, USA), 225-245. [https://doi.org/10.1007/978-0-387-84796-2\\_11](https://doi.org/10.1007/978-0-387-84796-2_11)
- Becker, A., and Theißen, G. (2003). The major clades of MADS-box genes and their role in the development and evolution of flowering plants. *Mol. Phylogenet. Evol.* 29, 464-489 [https://doi.org/10.1016/S1055-7903\(03\)00207-0](https://doi.org/10.1016/S1055-7903(03)00207-0).
- Erdmann, R., Gramzow, L., Melzer, R., Theißen, G., and Becker, A. (2010). *GORDITA (AGL63)* is a young paralog of the *Arabidopsis thaliana* B<sub>sister</sub> MADS box gene *ABS (TT16)* that has undergone neo-functionalization. *Plant J.* 63, 914-924. doi: 10.1111/j.1365-313X.2010.04290.x.
- Finkelstein, R.R., and Lynch, T.J. (2000). The Arabidopsis abscisic acid response gene *ABI5* encodes a basic leucine zipper transcription factor. *Plant Cell* 12, 599-609. <https://doi.org/10.1105/tpc.12.4.599>
- Ishiguro, S., and Nakamura, K. (1992). The nuclear factor SP8BF binds to the 5'-upstream regions of three different genes coding for major proteins of sweet potato tuberous roots. *Plant Mol. Biol.* 18, 97-108. doi: 10.1007/BF00018460
- Ishiguro, S., and Nakamura, K. (1994). Characterization of a cDNA encoding a novel DNA-binding protein, SPF1, that recognizes SP8 sequences in the 5' upstream regions of genes coding for sporamin and beta-amylase from sweet potato. *Mol. Gen. Genet.* 244, 563-571. doi: 10.1007/BF00282746
- Itzhaki, H., Maxson, J.M., and Woodson, W.R. (1994). An ethylene-responsive enhancer element is involved in the senescence-related expression of the carnation glutathione-S-transferase (*GST1*) gene. *Proc. Natl. Acad. Sci. USA* 91, 8925-8929. doi: 10.1073/pnas.91.19.8925
- Kamiya, N., Nagasaki, H., Morikami, A., Sato, Y., and Matsuoka, M. (2003). Isolation and characterization of a rice *WUSCHEL-type* homeobox gene that is specifically expressed in the central cells of a quiescent center in the root apical meristem. *Plant J.* 35, 429-441. doi: 10.1046/j.1365-313x.2003.01816.x
- Kim, S.Y., Chung, H.J., and Thomas, T.L. (1997). Isolation of a novel class of bZIP transcription factors that interact with ABA-responsive and embryo-specification elements in the *Dc3* promoter using a modified yeast one-hybrid system. *Plant J.* 11, 1237-q251. doi: 10.1046/j.1365-313x.1997.11061237.x
- Lau, S., Slane, D., Herud, O., Kong, J., and Jürgens, G. (2012). Early embryogenesis in flowering plants: Setting up the basic body pattern. *Annu. Rev. Plant Biol.* 63, 483-506. <https://doi.org/10.1146/annurev-arplant-042811-105507>

Lawton, M.A., Dean, S., Dron, M., Kooter, J.M., Kragh, K.M., Harrison, M.J., et al. (1991). Silencer region of a chalcone synthase promoter contains multiple binding sites for a factor, SBF-1, closely related to GT-1. *Plant Mol. Biol.* 16, 235-249. doi: 10.1007/BF00020555

Lopez-Molina, L., and Chua, N.H. (2000). A null mutation in a bZIP factor confers ABA-insensitivity in *Arabidopsis thaliana*. *Plant Cell Physiol.* 41, 541-547. doi: 10.1093/pcp/41.5.541

Meng, L., Liu, X., He, C., Xu, B., Li, Y., and Hu, Y. (2020). Functional divergence and adaptive selection of *KNOX* gene family in plants. *Open Life Sci.* 15, 346-363. <https://doi.org/10.1515/biol-2020-0036>

Montgomery, J., Goldman, S., Deikman, J., Margossian, L., and Fischer, R.L. (1993). Identification of an ethylene-responsive region in the promoter of a fruit ripening gene. *Proc. Natl. Acad. Sci. USA* 90, 5939-5943. <https://doi.org/10.1073/pnas.90.13.5939>

Mukherjee, K., Brocchieri, L., and Bürglin, T.R. (2009). A comprehensive classification and evolutionary analysis of plant homeobox genes. *Mol. Biol. Evol.* 26, 2775-2794. doi: 10.1093/molbev/msp201

Noguero, M., Atif, R.M., Ochatt, S., and Thompson, R.D. (2013). The role of the DNA-binding One Zinc Finger (DOF) transcription factor family in plants. *Plant Sci.* 209, 32-45. doi: 10.1016/j.plantsci.2013.03.016

Rawat, R., Xu, Z.F., Yao, K.M., and Chye, M.L. (2005). Identification of cis-elements for ethylene and circadian regulation of the *Solanum melongena* gene encoding cysteine proteinase. *Plant Mol Biol.* 57, 629-643. doi: 10.1007/s11103-005-0954-7

Shi, C.L., Stenvik, G.E., Vie, A.K., Bones, A.M., Pautot, V., Proveniers, M., et al. (2011). Arabidopsis class I KNOTTED-like homeobox proteins act downstream in the IDA-HAE/HSL2 floral abscission signaling pathway. *Plant Cell* 23, 2553-2567. doi: 10.1105/tpc.111.084608

Smaczniak, C., Immink, R.G.H., Muiño, J.M., Blanvillain, R., Busscher, M., Busscher-Lange, J., et al. (2012). Characterization of MADS-domain transcription factor complexes in *Arabidopsis* flower development. *Proc. Natl. Acad. Sci. USA* 109, 1560-1565. doi: 10.1073/pnas.1112871109

Tapia, G., Verdugo, I., Yáñez, M., Ahumada, I., Theoduloz, C., Cordero, C., et al. (2005). Involvement of ethylene in stress-induced expression of the *TLC1.1* retrotransposon from *Lycopersicon chilense* Dun. *Plant Physiol.* 138, 2075-2086. doi: 10.1104/pp.105.059766

Terzaghi, W.B., and Cashmore, A.R. (1995). Light-regulated transcription. *Annu. Rev. Plant Physiol. Plant Mol. Biol.* 46, 445-474.

Trindade, M., Tada, M., and Smith, J.C. (1999). DNA-binding specificity and embryological function of Xom (Xvent-2). *Dev. Biol.* 216, 442-456. <https://doi.org/10.1006/dbio.1999.9507>
